# Supplementary material
Source: publisher figshare collection journal article supplement (https://springernature.figshare.com/ndownloader/files/13158623)
Supplement: Supplementary file 1 [file 13158623]

X	Y	Date	Time	Bottomtype
650250	655606	21/07/2014	15:20:13	4
650251	655605	21/07/2014	15:20:15	4
650252	655604	21/07/2014	15:20:17	2
650254	655603	21/07/2014	15:20:19	4
650255	655603	21/07/2014	15:20:21	3
650257	655604	21/07/2014	15:20:23	4
650259	655605	21/07/2014	15:20:25	3
650261	655605	21/07/2014	15:20:28	4
650263	655606	21/07/2014	15:20:30	4
650265	655606	21/07/2014	15:20:32	4
650267	655606	21/07/2014	15:20:34	2
650269	655606	21/07/2014	15:20:36	4
650271	655606	21/07/2014	15:20:38	4
650273	655606	21/07/2014	15:20:40	4
650275	655606	21/07/2014	15:20:42	4
650278	655606	21/07/2014	15:20:44	4
650281	655606	21/07/2014	15:20:46	5
650284	655606	21/07/2014	15:20:48	4
650287	655606	21/07/2014	15:20:50	5
650290	655606	21/07/2014	15:20:52	4
650294	655606	21/07/2014	15:20:54	5
650297	655606	21/07/2014	15:20:56	4
650300	655606	21/07/2014	15:20:58	5
650304	655606	21/07/2014	15:21:00	3
650308	655606	21/07/2014	15:21:02	4
650313	655606	21/07/2014	15:21:04	4
650318	655607	21/07/2014	15:21:06	4
650323	655607	21/07/2014	15:21:08	4
650328	655607	21/07/2014	15:21:10	4
650334	655607	21/07/2014	15:21:12	5
650339	655606	21/07/2014	15:21:14	4
650344	655606	21/07/2014	15:21:16	4
650350	655605	21/07/2014	15:21:19	3
650355	655604	21/07/2014	15:21:21	4
650360	655604	21/07/2014	15:21:23	4
650365	655603	21/07/2014	15:21:25	4
650371	655603	21/07/2014	15:21:27	3
650376	655603	21/07/2014	15:21:29	3
650381	655604	21/07/2014	15:21:31	4
650386	655605	21/07/2014	15:21:33	3
650391	655606	21/07/2014	15:21:35	4
650397	655607	21/07/2014	15:21:37	3
650402	655608	21/07/2014	15:21:39	3
650407	655608	21/07/2014	15:21:41	2
650413	655608	21/07/2014	15:21:43	2
650418	655609	21/07/2014	15:21:45	4
650423	655609	21/07/2014	15:21:47	3
650429	655609	21/07/2014	15:21:49	4
650434	655610	21/07/2014	15:21:51	4
650439	655610	21/07/2014	15:21:53	4
650445	655610	21/07/2014	15:21:55	4
650450	655611	21/07/2014	15:21:57	3
650456	655612	21/07/2014	15:21:59	4
650461	655613	21/07/2014	15:22:01	2
650467	655614	21/07/2014	15:22:03	3
650473	655615	21/07/2014	15:22:05	4
650478	655616	21/07/2014	15:22:08	3
650484	655617	21/07/2014	15:22:10	4
650489	655617	21/07/2014	15:22:12	2
650495	655617	21/07/2014	15:22:14	3
650501	655618	21/07/2014	15:22:16	4
650507	655618	21/07/2014	15:22:18	4
650513	655618	21/07/2014	15:22:20	4
650519	655618	21/07/2014	15:22:22	4
650525	655618	21/07/2014	15:22:24	4
650531	655618	21/07/2014	15:22:26	3
650536	655617	21/07/2014	15:22:28	4
650543	655617	21/07/2014	15:22:30	3
650549	655617	21/07/2014	15:22:32	3
650554	655617	21/07/2014	15:22:34	4
650561	655618	21/07/2014	15:22:36	4
650567	655619	21/07/2014	15:22:38	4
650573	655619	21/07/2014	15:22:40	4
650578	655619	21/07/2014	15:22:42	3
650584	655619	21/07/2014	15:22:44	4
650590	655619	21/07/2014	15:22:46	3
650596	655620	21/07/2014	15:22:48	4
650602	655620	21/07/2014	15:22:50	4
650608	655621	21/07/2014	15:22:52	4
650614	655621	21/07/2014	15:22:54	4
650620	655620	21/07/2014	15:22:56	2
650626	655620	21/07/2014	15:22:59	3
650632	655620	21/07/2014	15:23:01	3
650638	655620	21/07/2014	15:23:03	3
650644	655619	21/07/2014	15:23:05	4
650650	655619	21/07/2014	15:23:07	3
650655	655619	21/07/2014	15:23:09	3
650661	655619	21/07/2014	15:23:11	3
650667	655618	21/07/2014	15:23:13	3
650673	655618	21/07/2014	15:23:15	2
650679	655618	21/07/2014	15:23:17	3
650685	655617	21/07/2014	15:23:19	2
650691	655617	21/07/2014	15:23:21	3
650697	655616	21/07/2014	15:23:23	3
650703	655616	21/07/2014	15:23:25	3
650709	655615	21/07/2014	15:23:27	3
650713	655615	21/07/2014	15:23:29	3
650725	655581	21/07/2014	15:24:17	3
650723	655581	21/07/2014	15:24:19	1
650720	655581	21/07/2014	15:24:21	1
650717	655582	21/07/2014	15:24:23	3
650713	655583	21/07/2014	15:24:25	1
650709	655583	21/07/2014	15:24:27	2
650704	655582	21/07/2014	15:24:29	1
650699	655581	21/07/2014	15:24:31	1
650695	655581	21/07/2014	15:24:33	3
650691	655581	21/07/2014	15:24:35	1
650688	655580	21/07/2014	15:24:37	1
650684	655580	21/07/2014	15:24:39	3
650681	655580	21/07/2014	15:24:41	1
650678	655580	21/07/2014	15:24:43	3
650674	655579	21/07/2014	15:24:45	1
650670	655579	21/07/2014	15:24:47	1
650667	655579	21/07/2014	15:24:49	3
650663	655579	21/07/2014	15:24:51	3
650659	655579	21/07/2014	15:24:53	2
650655	655579	21/07/2014	15:24:55	3
650651	655579	21/07/2014	15:24:57	3
650647	655579	21/07/2014	15:25:00	1
650642	655579	21/07/2014	15:25:02	3
650637	655579	21/07/2014	15:25:04	3
650632	655580	21/07/2014	15:25:06	3
650627	655580	21/07/2014	15:25:08	2
650621	655580	21/07/2014	15:25:10	3
650616	655580	21/07/2014	15:25:12	3
650610	655580	21/07/2014	15:25:14	4
650605	655580	21/07/2014	15:25:16	2
650599	655580	21/07/2014	15:25:18	2
650594	655580	21/07/2014	15:25:20	2
650588	655580	21/07/2014	15:25:22	2
650583	655580	21/07/2014	15:25:24	2
650578	655579	21/07/2014	15:25:26	4
650572	655579	21/07/2014	15:25:28	3
650566	655579	21/07/2014	15:25:30	3
650561	655579	21/07/2014	15:25:32	4
650555	655579	21/07/2014	15:25:34	3
650550	655579	21/07/2014	15:25:36	2
650545	655579	21/07/2014	15:25:38	4
650539	655579	21/07/2014	15:25:40	3
650534	655578	21/07/2014	15:25:42	5
650529	655578	21/07/2014	15:25:44	4
650524	655578	21/07/2014	15:25:46	3
650518	655578	21/07/2014	15:25:48	3
650513	655578	21/07/2014	15:25:51	3
650507	655578	21/07/2014	15:25:53	4
650502	655578	21/07/2014	15:25:55	3
650497	655578	21/07/2014	15:25:57	3
650491	655578	21/07/2014	15:25:59	4
650486	655578	21/07/2014	15:26:01	3
650481	655578	21/07/2014	15:26:03	3
650475	655578	21/07/2014	15:26:05	4
650469	655579	21/07/2014	15:26:07	4
650464	655579	21/07/2014	15:26:09	4
650459	655579	21/07/2014	15:26:11	3
650453	655579	21/07/2014	15:26:13	4
650448	655579	21/07/2014	15:26:15	4
650443	655579	21/07/2014	15:26:17	4
650437	655579	21/07/2014	15:26:19	4
650432	655579	21/07/2014	15:26:21	4
650427	655580	21/07/2014	15:26:23	2
650421	655580	21/07/2014	15:26:25	3
650416	655580	21/07/2014	15:26:27	3
650411	655580	21/07/2014	15:26:29	4
650405	655580	21/07/2014	15:26:31	4
650400	655581	21/07/2014	15:26:33	4
650394	655580	21/07/2014	15:26:35	2
650389	655580	21/07/2014	15:26:37	3
650384	655580	21/07/2014	15:26:40	4
650378	655580	21/07/2014	15:26:42	2
650373	655579	21/07/2014	15:26:44	4
650367	655579	21/07/2014	15:26:46	3
650362	655579	21/07/2014	15:26:48	4
650357	655579	21/07/2014	15:26:50	3
650351	655579	21/07/2014	15:26:52	3
650346	655579	21/07/2014	15:26:54	4
650340	655579	21/07/2014	15:26:56	2
650335	655579	21/07/2014	15:26:58	4
650329	655579	21/07/2014	15:27:00	4
650324	655579	21/07/2014	15:27:02	4
650318	655579	21/07/2014	15:27:04	3
650313	655578	21/07/2014	15:27:06	4
650307	655577	21/07/2014	15:27:08	4
650302	655576	21/07/2014	15:27:10	4
650296	655576	21/07/2014	15:27:12	4
650290	655576	21/07/2014	15:27:14	3
650285	655576	21/07/2014	15:27:16	4
650279	655575	21/07/2014	15:27:18	5
650274	655575	21/07/2014	15:27:20	4
650270	655574	21/07/2014	15:27:22	4
650267	655574	21/07/2014	15:27:24	4
650263	655573	21/07/2014	15:27:26	2
650260	655573	21/07/2014	15:27:28	2
650257	655572	21/07/2014	15:27:31	4
650254	655572	21/07/2014	15:27:33	2
650252	655571	21/07/2014	15:27:35	3
650251	655570	21/07/2014	15:27:36	3
650288	655559	21/07/2014	15:28:11	2
650291	655558	21/07/2014	15:28:13	4
650295	655558	21/07/2014	15:28:16	3
650299	655558	21/07/2014	15:28:18	4
650303	655557	21/07/2014	15:28:20	4
650308	655557	21/07/2014	15:28:22	2
650313	655557	21/07/2014	15:28:24	3
650319	655557	21/07/2014	15:28:26	3
650324	655558	21/07/2014	15:28:28	3
650329	655558	21/07/2014	15:28:30	4
650334	655559	21/07/2014	15:28:32	2
650340	655559	21/07/2014	15:28:34	4
650345	655561	21/07/2014	15:28:36	4
650351	655562	21/07/2014	15:28:38	3
650356	655563	21/07/2014	15:28:40	4
650362	655564	21/07/2014	15:28:42	4
650368	655566	21/07/2014	15:28:44	3
650373	655566	21/07/2014	15:28:46	3
650378	655566	21/07/2014	15:28:48	2
650384	655567	21/07/2014	15:28:50	4
650390	655568	21/07/2014	15:28:52	3
650396	655568	21/07/2014	15:28:54	3
650402	655568	21/07/2014	15:28:56	3
650408	655568	21/07/2014	15:28:58	3
650414	655569	21/07/2014	15:29:00	3
650420	655569	21/07/2014	15:29:02	3
650425	655570	21/07/2014	15:29:05	3
650431	655570	21/07/2014	15:29:07	4
650437	655570	21/07/2014	15:29:09	1
650443	655570	21/07/2014	15:29:11	4
650449	655569	21/07/2014	15:29:13	4
650454	655569	21/07/2014	15:29:15	3
650460	655570	21/07/2014	15:29:17	3
650466	655571	21/07/2014	15:29:19	4
650472	655570	21/07/2014	15:29:21	3
650478	655570	21/07/2014	15:29:23	3
650484	655570	21/07/2014	15:29:25	4
650490	655571	21/07/2014	15:29:27	3
650496	655570	21/07/2014	15:29:29	5
650501	655570	21/07/2014	15:29:31	3
650507	655570	21/07/2014	15:29:33	4
650513	655570	21/07/2014	15:29:35	4
650519	655569	21/07/2014	15:29:37	3
650524	655569	21/07/2014	15:29:39	3
650531	655569	21/07/2014	15:29:41	4
650536	655569	21/07/2014	15:29:43	4
650542	655568	21/07/2014	15:29:45	3
650548	655567	21/07/2014	15:29:47	2
650553	655566	21/07/2014	15:29:49	4
650559	655565	21/07/2014	15:29:51	4
650564	655565	21/07/2014	15:29:53	4
650570	655563	21/07/2014	15:29:56	3
650576	655562	21/07/2014	15:29:58	3
650581	655562	21/07/2014	15:30:00	3
650587	655562	21/07/2014	15:30:02	2
650593	655561	21/07/2014	15:30:04	3
650598	655561	21/07/2014	15:30:06	3
650604	655561	21/07/2014	15:30:08	3
650610	655560	21/07/2014	15:30:10	1
650615	655560	21/07/2014	15:30:12	1
650621	655560	21/07/2014	15:30:14	3
650627	655560	21/07/2014	15:30:16	1
650633	655560	21/07/2014	15:30:18	1
650639	655560	21/07/2014	15:30:20	1
650644	655559	21/07/2014	15:30:22	1
650650	655560	21/07/2014	15:30:24	1
650657	655560	21/07/2014	15:30:26	1
650663	655559	21/07/2014	15:30:28	1
650669	655559	21/07/2014	15:30:30	1
650674	655558	21/07/2014	15:30:32	1
650680	655558	21/07/2014	15:30:34	1
650685	655557	21/07/2014	15:30:36	1
650691	655556	21/07/2014	15:30:38	1
650696	655555	21/07/2014	15:30:40	1
650702	655555	21/07/2014	15:30:42	1
650708	655555	21/07/2014	15:30:44	1
650714	655554	21/07/2014	15:30:47	1
650719	655552	21/07/2014	15:30:49	1
650725	655551	21/07/2014	15:30:51	1
650731	655551	21/07/2014	15:30:53	1
650737	655550	21/07/2014	15:30:55	1
650742	655549	21/07/2014	15:30:57	1
650747	655547	21/07/2014	15:30:59	1
650751	655544	21/07/2014	15:31:01	1
650753	655539	21/07/2014	15:31:03	1
650753	655536	21/07/2014	15:31:04	1
650729	655538	21/07/2014	15:31:16	1
650725	655538	21/07/2014	15:31:18	1
650720	655538	21/07/2014	15:31:20	1
650714	655539	21/07/2014	15:31:22	1
650709	655539	21/07/2014	15:31:24	1
650704	655539	21/07/2014	15:31:26	1
650699	655540	21/07/2014	15:31:28	1
650693	655540	21/07/2014	15:31:30	1
650688	655540	21/07/2014	15:31:32	1
650683	655540	21/07/2014	15:31:34	1
650677	655540	21/07/2014	15:31:36	1
650672	655540	21/07/2014	15:31:38	1
650667	655539	21/07/2014	15:31:40	1
650661	655538	21/07/2014	15:31:42	1
650656	655537	21/07/2014	15:31:44	1
650651	655535	21/07/2014	15:31:46	1
650645	655535	21/07/2014	15:31:48	1
650640	655534	21/07/2014	15:31:51	1
650634	655534	21/07/2014	15:31:53	3
650629	655534	21/07/2014	15:31:55	1
650624	655534	21/07/2014	15:31:57	1
650618	655534	21/07/2014	15:31:59	2
650613	655533	21/07/2014	15:32:01	3
650607	655534	21/07/2014	15:32:03	3
650602	655534	21/07/2014	15:32:05	1
650597	655534	21/07/2014	15:32:07	1
650591	655534	21/07/2014	15:32:09	1
650586	655534	21/07/2014	15:32:11	1
650581	655534	21/07/2014	15:32:13	3
650576	655534	21/07/2014	15:32:15	3
650571	655535	21/07/2014	15:32:17	2
650565	655535	21/07/2014	15:32:19	3
650560	655536	21/07/2014	15:32:21	3
650555	655536	21/07/2014	15:32:23	3
650550	655536	21/07/2014	15:32:25	3
650544	655536	21/07/2014	15:32:27	1
650539	655537	21/07/2014	15:32:29	4
650534	655537	21/07/2014	15:32:31	3
650529	655537	21/07/2014	15:32:33	3
650523	655537	21/07/2014	15:32:35	3
650517	655537	21/07/2014	15:32:37	3
650512	655537	21/07/2014	15:32:39	3
650507	655537	21/07/2014	15:32:42	1
650502	655536	21/07/2014	15:32:44	3
650496	655535	21/07/2014	15:32:46	4
650491	655535	21/07/2014	15:32:48	4
650486	655535	21/07/2014	15:32:50	4
650480	655534	21/07/2014	15:32:52	3
650475	655534	21/07/2014	15:32:54	3
650469	655534	21/07/2014	15:32:56	3
650464	655533	21/07/2014	15:32:58	2
650459	655533	21/07/2014	15:33:00	3
650454	655532	21/07/2014	15:33:02	2
650448	655532	21/07/2014	15:33:04	3
650443	655532	21/07/2014	15:33:06	3
650437	655532	21/07/2014	15:33:08	3
650432	655532	21/07/2014	15:33:10	4
650427	655530	21/07/2014	15:33:12	3
650422	655527	21/07/2014	15:33:14	2
650417	655525	21/07/2014	15:33:16	3
650412	655523	21/07/2014	15:33:18	3
650407	655521	21/07/2014	15:33:20	3
650402	655520	21/07/2014	15:33:22	3
650396	655520	21/07/2014	15:33:24	3
650391	655520	21/07/2014	15:33:26	1
650386	655520	21/07/2014	15:33:28	3
650381	655521	21/07/2014	15:33:30	3
650376	655522	21/07/2014	15:33:33	2
650370	655523	21/07/2014	15:33:35	2
650365	655523	21/07/2014	15:33:37	3
650360	655524	21/07/2014	15:33:39	3
650355	655525	21/07/2014	15:33:41	1
650350	655525	21/07/2014	15:33:43	3
650344	655526	21/07/2014	15:33:45	2
650339	655526	21/07/2014	15:33:47	3
650334	655527	21/07/2014	15:33:49	3
650328	655528	21/07/2014	15:33:51	3
650323	655528	21/07/2014	15:33:53	3
650318	655529	21/07/2014	15:33:55	3
650312	655529	21/07/2014	15:33:57	3
650306	655530	21/07/2014	15:33:59	2
650301	655531	21/07/2014	15:34:01	4
650296	655532	21/07/2014	15:34:03	3
650291	655532	21/07/2014	15:34:05	3
650276	655504	21/07/2014	15:34:20	2
650278	655501	21/07/2014	15:34:22	1
650282	655500	21/07/2014	15:34:24	3
650286	655501	21/07/2014	15:34:26	2
650291	655501	21/07/2014	15:34:28	3
650297	655501	21/07/2014	15:34:30	3
650303	655501	21/07/2014	15:34:32	1
650309	655501	21/07/2014	15:34:34	1
650314	655501	21/07/2014	15:34:36	1
650320	655500	21/07/2014	15:34:38	1
650325	655500	21/07/2014	15:34:40	1
650332	655501	21/07/2014	15:34:43	1
650337	655501	21/07/2014	15:34:45	1
650343	655502	21/07/2014	15:34:47	1
650349	655502	21/07/2014	15:34:49	1
650354	655503	21/07/2014	15:34:51	1
650360	655503	21/07/2014	15:34:53	1
650366	655503	21/07/2014	15:34:55	1
650372	655503	21/07/2014	15:34:57	1
650377	655503	21/07/2014	15:34:59	1
650383	655502	21/07/2014	15:35:01	1
650389	655502	21/07/2014	15:35:03	3
650395	655503	21/07/2014	15:35:05	1
650400	655504	21/07/2014	15:35:07	1
650406	655504	21/07/2014	15:35:09	1
650411	655504	21/07/2014	15:35:11	1
650417	655505	21/07/2014	15:35:13	1
650423	655505	21/07/2014	15:35:15	1
650429	655505	21/07/2014	15:35:17	3
650434	655506	21/07/2014	15:35:19	3
650440	655506	21/07/2014	15:35:21	1
650446	655507	21/07/2014	15:35:23	3
650452	655508	21/07/2014	15:35:25	4
650457	655509	21/07/2014	15:35:27	1
650463	655510	21/07/2014	15:35:29	2
650469	655511	21/07/2014	15:35:31	1
650474	655512	21/07/2014	15:35:34	3
650480	655514	21/07/2014	15:35:36	1
650486	655514	21/07/2014	15:35:38	3
650491	655515	21/07/2014	15:35:40	1
650497	655515	21/07/2014	15:35:42	3
650502	655516	21/07/2014	15:35:44	3
650508	655516	21/07/2014	15:35:46	1
650514	655515	21/07/2014	15:35:48	3
650520	655515	21/07/2014	15:35:50	2
650526	655515	21/07/2014	15:35:52	2
650532	655515	21/07/2014	15:35:54	3
650538	655516	21/07/2014	15:35:56	3
650544	655516	21/07/2014	15:35:58	3
650549	655516	21/07/2014	15:36:00	1
650555	655516	21/07/2014	15:36:02	3
650561	655515	21/07/2014	15:36:04	2
650567	655516	21/07/2014	15:36:06	1
650573	655516	21/07/2014	15:36:08	1
650578	655515	21/07/2014	15:36:10	1
650584	655514	21/07/2014	15:36:12	1
650589	655514	21/07/2014	15:36:14	1
650594	655514	21/07/2014	15:36:16	1
650601	655513	21/07/2014	15:36:18	1
650607	655512	21/07/2014	15:36:20	1
650612	655511	21/07/2014	15:36:23	1
650618	655510	21/07/2014	15:36:25	1
650624	655509	21/07/2014	15:36:27	1
650630	655509	21/07/2014	15:36:29	1
650636	655508	21/07/2014	15:36:31	1
650642	655507	21/07/2014	15:36:33	1
650648	655506	21/07/2014	15:36:35	1
650654	655506	21/07/2014	15:36:37	1
650660	655505	21/07/2014	15:36:39	1
650665	655505	21/07/2014	15:36:41	1
650670	655504	21/07/2014	15:36:43	3
650676	655503	21/07/2014	15:36:45	1
650682	655503	21/07/2014	15:36:47	1
650688	655502	21/07/2014	15:36:49	1
650694	655502	21/07/2014	15:36:51	1
650700	655502	21/07/2014	15:36:53	1
650705	655501	21/07/2014	15:36:55	1
650710	655501	21/07/2014	15:36:57	1
650716	655500	21/07/2014	15:36:59	1
650723	655500	21/07/2014	15:37:01	3
650729	655499	21/07/2014	15:37:03	3
650734	655499	21/07/2014	15:37:05	1
650740	655498	21/07/2014	15:37:07	1
650745	655497	21/07/2014	15:37:09	1
650751	655494	21/07/2014	15:37:11	1
650755	655491	21/07/2014	15:37:14	1
650758	655487	21/07/2014	15:37:15	1
650756	655468	21/07/2014	15:37:23	2
650753	655465	21/07/2014	15:37:25	1
650749	655464	21/07/2014	15:37:27	1
650744	655465	21/07/2014	15:37:29	1
650739	655466	21/07/2014	15:37:31	1
650734	655466	21/07/2014	15:37:33	2
650728	655466	21/07/2014	15:37:35	1
650723	655467	21/07/2014	15:37:37	1
650718	655467	21/07/2014	15:37:39	1
650713	655467	21/07/2014	15:37:41	1
650708	655468	21/07/2014	15:37:43	1
650703	655468	21/07/2014	15:37:45	1
650697	655467	21/07/2014	15:37:47	1
650692	655468	21/07/2014	15:37:50	3
650687	655468	21/07/2014	15:37:52	1
650681	655468	21/07/2014	15:37:54	1
650676	655468	21/07/2014	15:37:56	2
650670	655468	21/07/2014	15:37:58	1
650665	655468	21/07/2014	15:38:00	3
650659	655468	21/07/2014	15:38:02	1
650654	655468	21/07/2014	15:38:04	1
650649	655468	21/07/2014	15:38:06	1
650643	655469	21/07/2014	15:38:08	1
650638	655469	21/07/2014	15:38:10	1
650633	655470	21/07/2014	15:38:12	2
650628	655472	21/07/2014	15:38:14	1
650623	655473	21/07/2014	15:38:16	1
650618	655474	21/07/2014	15:38:18	1
650612	655475	21/07/2014	15:38:20	1
650607	655476	21/07/2014	15:38:22	1
650603	655477	21/07/2014	15:38:24	1
650598	655478	21/07/2014	15:38:26	1
650592	655479	21/07/2014	15:38:28	1
650587	655480	21/07/2014	15:38:30	2
650582	655480	21/07/2014	15:38:32	1
650577	655481	21/07/2014	15:38:34	1
650571	655481	21/07/2014	15:38:36	1
650566	655482	21/07/2014	15:38:39	1
650561	655483	21/07/2014	15:38:41	1
650556	655483	21/07/2014	15:38:43	1
650551	655484	21/07/2014	15:38:45	3
650546	655484	21/07/2014	15:38:47	3
650541	655485	21/07/2014	15:38:49	1
650536	655485	21/07/2014	15:38:51	1
650531	655486	21/07/2014	15:38:53	1
650526	655486	21/07/2014	15:38:55	1
650520	655486	21/07/2014	15:38:57	1
650515	655486	21/07/2014	15:38:59	1
650509	655485	21/07/2014	15:39:01	1
650503	655485	21/07/2014	15:39:03	1
650498	655485	21/07/2014	15:39:05	1
650493	655484	21/07/2014	15:39:07	1
650488	655484	21/07/2014	15:39:09	1
650482	655484	21/07/2014	15:39:11	1
650477	655483	21/07/2014	15:39:13	1
650472	655483	21/07/2014	15:39:15	1
650466	655483	21/07/2014	15:39:17	1
650461	655483	21/07/2014	15:39:19	1
650456	655482	21/07/2014	15:39:21	1
650450	655482	21/07/2014	15:39:23	1
650445	655482	21/07/2014	15:39:25	1
650440	655481	21/07/2014	15:39:27	1
650435	655480	21/07/2014	15:39:30	1
650429	655480	21/07/2014	15:39:32	1
650424	655479	21/07/2014	15:39:34	1
650419	655480	21/07/2014	15:39:36	1
650414	655480	21/07/2014	15:39:38	1
650409	655480	21/07/2014	15:39:40	1
650404	655480	21/07/2014	15:39:42	1
650399	655480	21/07/2014	15:39:44	1
650394	655480	21/07/2014	15:39:46	3
650388	655480	21/07/2014	15:39:48	1
650383	655481	21/07/2014	15:39:50	1
650378	655480	21/07/2014	15:39:52	2
650372	655481	21/07/2014	15:39:54	1
650367	655481	21/07/2014	15:39:56	1
650361	655481	21/07/2014	15:39:58	1
650356	655480	21/07/2014	15:40:00	1
650351	655479	21/07/2014	15:40:02	1
650346	655479	21/07/2014	15:40:04	1
650340	655478	21/07/2014	15:40:06	1
650335	655477	21/07/2014	15:40:08	1
650329	655476	21/07/2014	15:40:10	1
650324	655476	21/07/2014	15:40:12	1
650319	655476	21/07/2014	15:40:14	1
650313	655476	21/07/2014	15:40:16	1
650308	655475	21/07/2014	15:40:18	1
650303	655475	21/07/2014	15:40:21	1
650297	655474	21/07/2014	15:40:23	1
650292	655474	21/07/2014	15:40:25	1
650287	655474	21/07/2014	15:40:27	1
650281	655474	21/07/2014	15:40:29	2
650276	655473	21/07/2014	15:40:31	3
650271	655472	21/07/2014	15:40:33	1
650265	655472	21/07/2014	15:40:35	1
650260	655472	21/07/2014	15:40:37	2
650256	655471	21/07/2014	15:40:39	2
650247	655454	21/07/2014	15:40:55	3
650248	655453	21/07/2014	15:40:57	2
650251	655452	21/07/2014	15:40:59	1
650254	655451	21/07/2014	15:41:01	1
650257	655452	21/07/2014	15:41:03	1
650261	655452	21/07/2014	15:41:05	1
650266	655453	21/07/2014	15:41:07	1
650271	655454	21/07/2014	15:41:09	1
650277	655454	21/07/2014	15:41:11	1
650282	655455	21/07/2014	15:41:13	1
650287	655455	21/07/2014	15:41:15	1
650293	655455	21/07/2014	15:41:17	1
650298	655456	21/07/2014	15:41:19	1
650304	655457	21/07/2014	15:41:21	1
650310	655457	21/07/2014	15:41:23	1
650321	655457	21/07/2014	15:41:28	2
650326	655457	21/07/2014	15:41:30	1
650332	655457	21/07/2014	15:41:32	2
650337	655458	21/07/2014	15:41:34	1
650343	655458	21/07/2014	15:41:36	1
650349	655458	21/07/2014	15:41:38	1
650355	655458	21/07/2014	15:41:40	1
650361	655458	21/07/2014	15:41:42	1
650367	655459	21/07/2014	15:41:44	1
650372	655459	21/07/2014	15:41:46	1
650378	655460	21/07/2014	15:41:48	1
650384	655460	21/07/2014	15:41:50	1
650389	655460	21/07/2014	15:41:52	1
650394	655460	21/07/2014	15:41:54	2
650400	655460	21/07/2014	15:41:56	2
650406	655461	21/07/2014	15:41:58	1
650412	655462	21/07/2014	15:42:00	1
650418	655463	21/07/2014	15:42:02	1
650423	655463	21/07/2014	15:42:04	1
650434	655463	21/07/2014	15:42:08	3
650445	655464	21/07/2014	15:42:12	1
650451	655465	21/07/2014	15:42:15	1
650457	655465	21/07/2014	15:42:17	1
650463	655466	21/07/2014	15:42:19	1
650468	655466	21/07/2014	15:42:21	1
650474	655466	21/07/2014	15:42:23	1
650479	655466	21/07/2014	15:42:25	1
650485	655466	21/07/2014	15:42:27	1
650492	655467	21/07/2014	15:42:29	1
650497	655468	21/07/2014	15:42:31	1
650503	655468	21/07/2014	15:42:33	1
650509	655467	21/07/2014	15:42:35	1
650514	655468	21/07/2014	15:42:37	1
650520	655467	21/07/2014	15:42:39	1
650526	655467	21/07/2014	15:42:41	1
650532	655468	21/07/2014	15:42:43	2
650538	655468	21/07/2014	15:42:45	1
650544	655468	21/07/2014	15:42:47	1
650549	655468	21/07/2014	15:42:49	3
650555	655467	21/07/2014	15:42:51	1
650560	655465	21/07/2014	15:42:53	3
650566	655465	21/07/2014	15:42:55	1
650571	655464	21/07/2014	15:42:57	1
650577	655463	21/07/2014	15:42:59	1
650583	655463	21/07/2014	15:43:01	1
650589	655462	21/07/2014	15:43:03	1
650595	655461	21/07/2014	15:43:06	2
650600	655460	21/07/2014	15:43:08	1
650605	655460	21/07/2014	15:43:10	1
650611	655459	21/07/2014	15:43:12	2
650616	655459	21/07/2014	15:43:14	1
650622	655458	21/07/2014	15:43:16	1
650627	655457	21/07/2014	15:43:18	1
650633	655457	21/07/2014	15:43:20	1
650639	655456	21/07/2014	15:43:22	1
650644	655455	21/07/2014	15:43:24	1
650650	655454	21/07/2014	15:43:26	1
650656	655453	21/07/2014	15:43:28	1
650662	655452	21/07/2014	15:43:30	1
650667	655451	21/07/2014	15:43:32	1
650672	655451	21/07/2014	15:43:34	1
650678	655449	21/07/2014	15:43:36	1
650683	655448	21/07/2014	15:43:38	1
650688	655447	21/07/2014	15:43:40	1
650694	655447	21/07/2014	15:43:42	1
650700	655446	21/07/2014	15:43:44	1
650705	655445	21/07/2014	15:43:46	1
650711	655444	21/07/2014	15:43:48	3
650717	655443	21/07/2014	15:43:50	1
650722	655442	21/07/2014	15:43:52	1
650727	655441	21/07/2014	15:43:54	1
650733	655441	21/07/2014	15:43:57	1
650738	655441	21/07/2014	15:43:59	1
650744	655440	21/07/2014	15:44:01	1
650749	655439	21/07/2014	15:44:03	1
650755	655438	21/07/2014	15:44:05	1
650760	655437	21/07/2014	15:44:07	1
650766	655436	21/07/2014	15:44:09	1
650771	655435	21/07/2014	15:44:11	1
650773	655420	21/07/2014	15:44:22	1
650768	655421	21/07/2014	15:44:24	1
650763	655421	21/07/2014	15:44:26	1
650758	655422	21/07/2014	15:44:28	1
650753	655422	21/07/2014	15:44:30	1
650748	655423	21/07/2014	15:44:32	1
650743	655423	21/07/2014	15:44:34	1
650738	655423	21/07/2014	15:44:36	1
650732	655423	21/07/2014	15:44:38	1
650727	655423	21/07/2014	15:44:40	1
650722	655424	21/07/2014	15:44:42	1
650717	655424	21/07/2014	15:44:44	1
650712	655424	21/07/2014	15:44:46	1
650706	655424	21/07/2014	15:44:48	3
650701	655424	21/07/2014	15:44:50	1
650696	655424	21/07/2014	15:44:52	1
650690	655423	21/07/2014	15:44:54	1
650685	655423	21/07/2014	15:44:56	1
650680	655422	21/07/2014	15:44:58	1
650675	655421	21/07/2014	15:45:00	1
650670	655421	21/07/2014	15:45:02	1
650664	655420	21/07/2014	15:45:04	1
650659	655418	21/07/2014	15:45:07	1
650649	655418	21/07/2014	15:45:11	2
650644	655419	21/07/2014	15:45:13	1
650640	655420	21/07/2014	15:45:15	3
650635	655422	21/07/2014	15:45:17	1
650630	655425	21/07/2014	15:45:19	1
650625	655427	21/07/2014	15:45:21	1
650620	655429	21/07/2014	15:45:23	1
650615	655432	21/07/2014	15:45:25	1
650611	655434	21/07/2014	15:45:27	3
650606	655436	21/07/2014	15:45:29	2
650601	655438	21/07/2014	15:45:31	1
650597	655439	21/07/2014	15:45:33	1
650591	655440	21/07/2014	15:45:35	1
650586	655440	21/07/2014	15:45:37	3
650581	655441	21/07/2014	15:45:39	1
650576	655442	21/07/2014	15:45:41	2
650571	655442	21/07/2014	15:45:43	1
650566	655443	21/07/2014	15:45:45	1
650560	655443	21/07/2014	15:45:47	1
650555	655443	21/07/2014	15:45:49	1
650550	655443	21/07/2014	15:45:51	1
650545	655443	21/07/2014	15:45:53	1
650540	655443	21/07/2014	15:45:56	2
650535	655443	21/07/2014	15:45:58	1
650529	655443	21/07/2014	15:46:00	1
650525	655444	21/07/2014	15:46:02	1
650519	655444	21/07/2014	15:46:04	1
650514	655444	21/07/2014	15:46:06	1
650510	655444	21/07/2014	15:46:08	1
650499	655444	21/07/2014	15:46:12	1
650494	655445	21/07/2014	15:46:14	1
650489	655445	21/07/2014	15:46:16	1
650484	655446	21/07/2014	15:46:18	1
650478	655447	21/07/2014	15:46:20	1
650473	655448	21/07/2014	15:46:22	1
650468	655448	21/07/2014	15:46:24	1
650463	655448	21/07/2014	15:46:26	1
650458	655448	21/07/2014	15:46:28	1
650453	655448	21/07/2014	15:46:30	1
650443	655448	21/07/2014	15:46:34	1
650438	655448	21/07/2014	15:46:36	1
650434	655448	21/07/2014	15:46:38	1
650429	655448	21/07/2014	15:46:40	1
650424	655448	21/07/2014	15:46:42	1
650419	655448	21/07/2014	15:46:44	2
650409	655448	21/07/2014	15:46:49	1
650404	655448	21/07/2014	15:46:51	1
650399	655447	21/07/2014	15:46:53	1
650394	655447	21/07/2014	15:46:55	1
650389	655446	21/07/2014	15:46:57	1
650385	655445	21/07/2014	15:46:59	1
650380	655445	21/07/2014	15:47:01	1
650366	655443	21/07/2014	15:47:07	3
650361	655443	21/07/2014	15:47:09	1
650356	655443	21/07/2014	15:47:11	1
650351	655443	21/07/2014	15:47:13	1
650346	655442	21/07/2014	15:47:15	2
650342	655442	21/07/2014	15:47:17	1
650337	655442	21/07/2014	15:47:19	1
650332	655441	21/07/2014	15:47:21	1
650327	655442	21/07/2014	15:47:23	2
650322	655441	21/07/2014	15:47:25	1
650317	655441	21/07/2014	15:47:27	1
650307	655440	21/07/2014	15:47:31	1
650302	655439	21/07/2014	15:47:33	1
650297	655438	21/07/2014	15:47:36	1
650283	655433	21/07/2014	15:47:42	1
650278	655432	21/07/2014	15:47:44	1
650269	655429	21/07/2014	15:47:48	1
650259	655427	21/07/2014	15:47:52	1
650249	655427	21/07/2014	15:47:56	1
650245	655427	21/07/2014	15:47:58	1
650240	655427	21/07/2014	15:48:00	2
650237	655426	21/07/2014	15:48:02	2
650235	655425	21/07/2014	15:48:04	1
650232	655401	21/07/2014	15:48:29	1
650235	655401	21/07/2014	15:48:31	1
650239	655401	21/07/2014	15:48:33	1
650244	655402	21/07/2014	15:48:35	1
650260	655404	21/07/2014	15:48:42	1
650271	655404	21/07/2014	15:48:46	1
650282	655405	21/07/2014	15:48:50	1
650287	655404	21/07/2014	15:48:52	1
650300	655404	21/07/2014	15:49:00	1
650303	655404	21/07/2014	15:49:02	1
650305	655404	21/07/2014	15:49:04	1
650309	655404	21/07/2014	15:49:08	1
650313	655404	21/07/2014	15:49:12	2
650315	655404	21/07/2014	15:49:14	1
650316	655405	21/07/2014	15:49:16	1
650321	655405	21/07/2014	15:49:22	1
650322	655406	21/07/2014	15:49:24	1
650324	655405	21/07/2014	15:49:26	1
650328	655406	21/07/2014	15:49:31	2
650329	655406	21/07/2014	15:49:33	2
650331	655406	21/07/2014	15:49:35	3
650333	655406	21/07/2014	15:49:37	1
650334	655406	21/07/2014	15:49:39	1
650335	655406	21/07/2014	15:49:41	3
650337	655406	21/07/2014	15:49:43	1
650338	655407	21/07/2014	15:49:45	3
650339	655407	21/07/2014	15:49:47	1
650341	655407	21/07/2014	15:49:49	1
650341	655406	21/07/2014	15:49:51	1
650342	655407	21/07/2014	15:49:53	1
650344	655407	21/07/2014	15:49:55	1
650346	655407	21/07/2014	15:49:57	2
650349	655408	21/07/2014	15:49:59	1
650352	655408	21/07/2014	15:50:01	3
650356	655408	21/07/2014	15:50:03	2
650375	655410	21/07/2014	15:50:11	2
650380	655411	21/07/2014	15:50:13	1
650384	655413	21/07/2014	15:50:15	1
650388	655415	21/07/2014	15:50:17	1
650392	655417	21/07/2014	15:50:20	1
650396	655419	21/07/2014	15:50:22	1
650401	655420	21/07/2014	15:50:24	1
650406	655421	21/07/2014	15:50:26	1
650411	655422	21/07/2014	15:50:28	1
650416	655423	21/07/2014	15:50:30	1
650422	655423	21/07/2014	15:50:32	1
650427	655423	21/07/2014	15:50:34	1
650432	655424	21/07/2014	15:50:36	1
650438	655424	21/07/2014	15:50:38	1
650443	655424	21/07/2014	15:50:40	1
650448	655424	21/07/2014	15:50:42	1
650453	655424	21/07/2014	15:50:44	1
650458	655423	21/07/2014	15:50:46	2
650463	655423	21/07/2014	15:50:48	3
650468	655422	21/07/2014	15:50:50	1
650473	655421	21/07/2014	15:50:52	2
650478	655420	21/07/2014	15:50:54	1
650483	655420	21/07/2014	15:50:56	3
650488	655419	21/07/2014	15:50:58	1
650499	655420	21/07/2014	15:51:02	1
650504	655419	21/07/2014	15:51:04	1
650510	655419	21/07/2014	15:51:06	1
650515	655420	21/07/2014	15:51:09	1
650520	655419	21/07/2014	15:51:11	1
650525	655419	21/07/2014	15:51:13	1
650531	655419	21/07/2014	15:51:15	1
650536	655419	21/07/2014	15:51:17	1
650541	655419	21/07/2014	15:51:19	1
650546	655418	21/07/2014	15:51:21	1
650552	655418	21/07/2014	15:51:23	1
650557	655418	21/07/2014	15:51:25	1
650563	655418	21/07/2014	15:51:27	1
650568	655418	21/07/2014	15:51:29	1
650573	655417	21/07/2014	15:51:31	1
650578	655417	21/07/2014	15:51:33	1
650584	655416	21/07/2014	15:51:35	1
650589	655415	21/07/2014	15:51:37	1
650594	655415	21/07/2014	15:51:39	1
650599	655415	21/07/2014	15:51:41	2
650605	655414	21/07/2014	15:51:43	1
650610	655414	21/07/2014	15:51:45	1
650615	655413	21/07/2014	15:51:47	1
650620	655411	21/07/2014	15:51:49	1
650625	655408	21/07/2014	15:51:51	1
650629	655406	21/07/2014	15:51:53	1
650634	655403	21/07/2014	15:51:55	1
650638	655401	21/07/2014	15:51:57	1
650643	655398	21/07/2014	15:52:00	1
650648	655395	21/07/2014	15:52:02	1
650653	655394	21/07/2014	15:52:04	1
650658	655392	21/07/2014	15:52:06	1
650663	655391	21/07/2014	15:52:08	2
650668	655389	21/07/2014	15:52:10	2
650673	655389	21/07/2014	15:52:12	1
650678	655389	21/07/2014	15:52:14	1
650683	655388	21/07/2014	15:52:16	1
650689	655388	21/07/2014	15:52:18	1
650694	655388	21/07/2014	15:52:20	1
650699	655388	21/07/2014	15:52:22	1
650705	655388	21/07/2014	15:52:24	1
650711	655388	21/07/2014	15:52:26	1
650716	655388	21/07/2014	15:52:28	1
650722	655388	21/07/2014	15:52:30	1
650728	655388	21/07/2014	15:52:32	1
650733	655388	21/07/2014	15:52:34	1
650738	655388	21/07/2014	15:52:36	1
650744	655388	21/07/2014	15:52:38	1
650748	655388	21/07/2014	15:52:40	1
650754	655388	21/07/2014	15:52:42	1
650759	655388	21/07/2014	15:52:44	1
650765	655387	21/07/2014	15:52:46	1
650770	655387	21/07/2014	15:52:48	1
650775	655387	21/07/2014	15:52:51	1
650780	655386	21/07/2014	15:52:53	3
650785	655384	21/07/2014	15:52:55	1
650791	655383	21/07/2014	15:52:57	1
650796	655381	21/07/2014	15:52:59	1
650800	655379	21/07/2014	15:53:01	1
650804	655376	21/07/2014	15:53:03	1
650806	655373	21/07/2014	15:53:05	1
650801	655349	21/07/2014	15:53:15	1
650797	655347	21/07/2014	15:53:17	1
650792	655346	21/07/2014	15:53:19	1
650787	655346	21/07/2014	15:53:21	1
650782	655347	21/07/2014	15:53:23	1
650777	655348	21/07/2014	15:53:26	1
650773	655348	21/07/2014	15:53:28	1
650768	655349	21/07/2014	15:53:30	1
650764	655350	21/07/2014	15:53:32	1
650759	655351	21/07/2014	15:53:34	1
650755	655352	21/07/2014	15:53:36	1
650750	655354	21/07/2014	15:53:38	1
650746	655356	21/07/2014	15:53:40	1
650742	655357	21/07/2014	15:53:42	1
650738	655358	21/07/2014	15:53:44	1
650733	655359	21/07/2014	15:53:46	1
650727	655359	21/07/2014	15:53:48	1
650722	655359	21/07/2014	15:53:50	1
650717	655359	21/07/2014	15:53:52	2
650712	655358	21/07/2014	15:53:54	1
650707	655358	21/07/2014	15:53:56	1
650702	655358	21/07/2014	15:53:58	1
650698	655358	21/07/2014	15:54:00	1
650693	655358	21/07/2014	15:54:02	1
650689	655359	21/07/2014	15:54:04	1
650685	655360	21/07/2014	15:54:06	2
650680	655361	21/07/2014	15:54:08	1
650676	655363	21/07/2014	15:54:10	1
650671	655364	21/07/2014	15:54:12	1
650666	655365	21/07/2014	15:54:14	2
650661	655366	21/07/2014	15:54:17	3
650657	655368	21/07/2014	15:54:19	1
650652	655368	21/07/2014	15:54:21	1
650646	655369	21/07/2014	15:54:23	1
650641	655370	21/07/2014	15:54:25	1
650637	655371	21/07/2014	15:54:27	1
650633	655373	21/07/2014	15:54:29	1
650624	655377	21/07/2014	15:54:33	1
650620	655379	21/07/2014	15:54:35	1
650615	655380	21/07/2014	15:54:37	1
650611	655381	21/07/2014	15:54:39	1
650602	655383	21/07/2014	15:54:43	1
650597	655384	21/07/2014	15:54:45	1
650592	655384	21/07/2014	15:54:47	2
650587	655384	21/07/2014	15:54:49	1
650582	655384	21/07/2014	15:54:51	2
650578	655383	21/07/2014	15:54:53	2
650573	655383	21/07/2014	15:54:55	1
650568	655382	21/07/2014	15:54:57	1
650558	655382	21/07/2014	15:55:01	3
650553	655383	21/07/2014	15:55:03	1
650548	655383	21/07/2014	15:55:06	1
650543	655385	21/07/2014	15:55:08	1
650539	655387	21/07/2014	15:55:10	1
650534	655388	21/07/2014	15:55:12	1
650530	655389	21/07/2014	15:55:14	1
650526	655391	21/07/2014	15:55:16	1
650522	655393	21/07/2014	15:55:18	2
650517	655394	21/07/2014	15:55:20	1
650513	655396	21/07/2014	15:55:22	1
650508	655397	21/07/2014	15:55:24	1
650504	655397	21/07/2014	15:55:26	1
650499	655397	21/07/2014	15:55:28	2
650486	655397	21/07/2014	15:55:34	1
650481	655397	21/07/2014	15:55:36	1
650477	655397	21/07/2014	15:55:38	1
650472	655397	21/07/2014	15:55:40	4
650467	655397	21/07/2014	15:55:42	1
650463	655397	21/07/2014	15:55:44	1
650453	655397	21/07/2014	15:55:48	1
650449	655397	21/07/2014	15:55:50	1
650444	655397	21/07/2014	15:55:52	1
650439	655397	21/07/2014	15:55:54	1
650434	655397	21/07/2014	15:55:57	1
650429	655398	21/07/2014	15:55:59	1
650425	655398	21/07/2014	15:56:01	1
650420	655399	21/07/2014	15:56:03	2
650415	655399	21/07/2014	15:56:05	2
650411	655400	21/07/2014	15:56:07	1
650406	655401	21/07/2014	15:56:09	1
650401	655401	21/07/2014	15:56:11	1
650397	655402	21/07/2014	15:56:13	1
650392	655401	21/07/2014	15:56:15	1
650387	655401	21/07/2014	15:56:17	1
650378	655400	21/07/2014	15:56:21	2
650373	655400	21/07/2014	15:56:23	2
650369	655399	21/07/2014	15:56:25	3
650365	655398	21/07/2014	15:56:27	1
650360	655396	21/07/2014	15:56:29	2
650356	655394	21/07/2014	15:56:31	2
650352	655392	21/07/2014	15:56:33	1
650347	655391	21/07/2014	15:56:35	3
650342	655389	21/07/2014	15:56:37	1
650338	655388	21/07/2014	15:56:39	1
650334	655386	21/07/2014	15:56:41	1
650329	655385	21/07/2014	15:56:43	1
650324	655384	21/07/2014	15:56:46	1
650320	655383	21/07/2014	15:56:48	1
650310	655382	21/07/2014	15:56:52	3
650306	655382	21/07/2014	15:56:54	1
650301	655381	21/07/2014	15:56:56	1
650296	655381	21/07/2014	15:56:58	1
650291	655380	21/07/2014	15:57:00	1
650286	655379	21/07/2014	15:57:02	1
650281	655379	21/07/2014	15:57:04	1
650271	655377	21/07/2014	15:57:08	1
650266	655376	21/07/2014	15:57:10	1
650261	655376	21/07/2014	15:57:12	1
650256	655375	21/07/2014	15:57:14	1
650251	655374	21/07/2014	15:57:16	1
650246	655374	21/07/2014	15:57:18	1
650243	655373	21/07/2014	15:57:20	1
650245	655357	21/07/2014	15:57:38	2
650249	655356	21/07/2014	15:57:40	1
650253	655354	21/07/2014	15:57:42	1
650258	655353	21/07/2014	15:57:44	1
650267	655350	21/07/2014	15:57:48	3
650277	655347	21/07/2014	15:57:52	1
650286	655346	21/07/2014	15:57:56	2
650291	655346	21/07/2014	15:57:58	1
650296	655346	21/07/2014	15:58:00	1
650301	655346	21/07/2014	15:58:02	1
650305	655347	21/07/2014	15:58:04	1
650313	655351	21/07/2014	15:58:08	1
650322	655355	21/07/2014	15:58:13	1
650326	655356	21/07/2014	15:58:15	2
650331	655358	21/07/2014	15:58:17	1
650336	655359	21/07/2014	15:58:19	1
650341	655361	21/07/2014	15:58:21	1
650346	655362	21/07/2014	15:58:23	1
650351	655363	21/07/2014	15:58:25	1
650356	655364	21/07/2014	15:58:27	1
650362	655364	21/07/2014	15:58:29	1
650372	655363	21/07/2014	15:58:33	1
650377	655362	21/07/2014	15:58:35	1
650383	655362	21/07/2014	15:58:37	1
650388	655362	21/07/2014	15:58:39	1
650393	655362	21/07/2014	15:58:41	1
650403	655364	21/07/2014	15:58:45	1
650408	655365	21/07/2014	15:58:47	1
650418	655368	21/07/2014	15:58:51	1
650423	655370	21/07/2014	15:58:53	1
650428	655371	21/07/2014	15:58:55	1
650433	655372	21/07/2014	15:58:57	1
650438	655373	21/07/2014	15:59:00	1
650443	655374	21/07/2014	15:59:02	1
650449	655374	21/07/2014	15:59:04	1
650454	655375	21/07/2014	15:59:06	1
650459	655376	21/07/2014	15:59:08	3
650464	655377	21/07/2014	15:59:10	2
650469	655378	21/07/2014	15:59:12	1
650474	655378	21/07/2014	15:59:14	1
650479	655377	21/07/2014	15:59:16	1
650490	655377	21/07/2014	15:59:20	1
650495	655376	21/07/2014	15:59:22	1
650500	655376	21/07/2014	15:59:24	1
650505	655376	21/07/2014	15:59:26	1
650525	655371	21/07/2014	15:59:34	2
650530	655370	21/07/2014	15:59:36	2
650539	655366	21/07/2014	15:59:40	1
650543	655364	21/07/2014	15:59:42	1
650548	655362	21/07/2014	15:59:44	1
650553	655360	21/07/2014	15:59:46	1
650558	655359	21/07/2014	15:59:48	1
650562	655357	21/07/2014	15:59:51	1
650572	655355	21/07/2014	15:59:55	1
650576	655354	21/07/2014	15:59:57	1
650581	655353	21/07/2014	15:59:59	1
650586	655352	21/07/2014	16:00:01	1
650591	655351	21/07/2014	16:00:03	1
650595	655350	21/07/2014	16:00:05	1
650600	655349	21/07/2014	16:00:07	3
650605	655348	21/07/2014	16:00:09	1
650610	655347	21/07/2014	16:00:11	1
650615	655346	21/07/2014	16:00:13	1
650620	655346	21/07/2014	16:00:15	1
650625	655346	21/07/2014	16:00:17	1
650630	655346	21/07/2014	16:00:19	1
650635	655346	21/07/2014	16:00:21	1
650640	655347	21/07/2014	16:00:23	1
650645	655347	21/07/2014	16:00:25	1
650650	655346	21/07/2014	16:00:27	1
650655	655345	21/07/2014	16:00:29	1
650660	655344	21/07/2014	16:00:31	1
650664	655343	21/07/2014	16:00:33	1
650669	655341	21/07/2014	16:00:35	1
650674	655340	21/07/2014	16:00:37	1
650678	655338	21/07/2014	16:00:40	1
650682	655335	21/07/2014	16:00:42	1
650686	655332	21/07/2014	16:00:44	1
650691	655329	21/07/2014	16:00:46	1
650695	655326	21/07/2014	16:00:48	1
650699	655323	21/07/2014	16:00:50	1
650703	655320	21/07/2014	16:00:52	1
650707	655317	21/07/2014	16:00:54	1
650711	655315	21/07/2014	16:00:56	2
650715	655313	21/07/2014	16:00:58	1
650719	655311	21/07/2014	16:01:00	1
650724	655309	21/07/2014	16:01:02	1
650729	655308	21/07/2014	16:01:04	1
650734	655307	21/07/2014	16:01:06	1
650739	655306	21/07/2014	16:01:08	1
650743	655305	21/07/2014	16:01:10	1
650748	655304	21/07/2014	16:01:12	1
650753	655304	21/07/2014	16:01:14	1
650758	655303	21/07/2014	16:01:16	1
650763	655303	21/07/2014	16:01:18	2
650768	655303	21/07/2014	16:01:20	1
650773	655303	21/07/2014	16:01:22	1
650778	655303	21/07/2014	16:01:24	1
650783	655303	21/07/2014	16:01:26	1
650788	655303	21/07/2014	16:01:28	1
650793	655302	21/07/2014	16:01:31	1
650798	655301	21/07/2014	16:01:33	1
650802	655299	21/07/2014	16:01:35	1
650802	655276	21/07/2014	16:01:49	1
650797	655277	21/07/2014	16:01:51	1
650793	655279	21/07/2014	16:01:53	1
650789	655281	21/07/2014	16:01:55	1
650785	655283	21/07/2014	16:01:57	1
650781	655285	21/07/2014	16:01:59	1
650777	655287	21/07/2014	16:02:01	1
650772	655287	21/07/2014	16:02:03	1
650768	655286	21/07/2014	16:02:05	1
650763	655285	21/07/2014	16:02:08	3
650759	655284	21/07/2014	16:02:10	1
650754	655283	21/07/2014	16:02:12	1
650749	655282	21/07/2014	16:02:14	1
650744	655282	21/07/2014	16:02:16	1
650739	655282	21/07/2014	16:02:18	1
650735	655283	21/07/2014	16:02:20	1
650730	655284	21/07/2014	16:02:22	1
650725	655285	21/07/2014	16:02:24	1
650720	655286	21/07/2014	16:02:26	1
650715	655287	21/07/2014	16:02:28	1
650711	655288	21/07/2014	16:02:30	1
650707	655290	21/07/2014	16:02:32	1
650702	655292	21/07/2014	16:02:34	1
650698	655294	21/07/2014	16:02:36	1
650694	655297	21/07/2014	16:02:38	2
650689	655299	21/07/2014	16:02:40	1
650685	655302	21/07/2014	16:02:42	1
650680	655304	21/07/2014	16:02:44	1
650676	655307	21/07/2014	16:02:46	1
650669	655312	21/07/2014	16:02:50	1
650665	655315	21/07/2014	16:02:52	1
650657	655321	21/07/2014	16:02:56	1
650654	655323	21/07/2014	16:02:59	1
650650	655326	21/07/2014	16:03:01	1
650646	655327	21/07/2014	16:03:03	1
650641	655329	21/07/2014	16:03:05	2
650637	655330	21/07/2014	16:03:07	1
650627	655331	21/07/2014	16:03:11	1
650622	655330	21/07/2014	16:03:13	1
650617	655329	21/07/2014	16:03:15	1
650613	655328	21/07/2014	16:03:17	1
650608	655327	21/07/2014	16:03:19	1
650599	655325	21/07/2014	16:03:23	1
650594	655324	21/07/2014	16:03:25	1
650588	655324	21/07/2014	16:03:27	1
650583	655324	21/07/2014	16:03:29	1
650578	655324	21/07/2014	16:03:31	2
650574	655326	21/07/2014	16:03:33	2
650569	655327	21/07/2014	16:03:35	1
650564	655328	21/07/2014	16:03:37	1
650558	655329	21/07/2014	16:03:39	1
650553	655329	21/07/2014	16:03:41	1
650548	655330	21/07/2014	16:03:43	1
650543	655331	21/07/2014	16:03:45	2
650538	655332	21/07/2014	16:03:47	1
650534	655334	21/07/2014	16:03:50	1
650528	655336	21/07/2014	16:03:52	1
650519	655340	21/07/2014	16:03:56	1
650514	655341	21/07/2014	16:03:58	1
650509	655342	21/07/2014	16:04:00	2
650504	655342	21/07/2014	16:04:02	1
650499	655342	21/07/2014	16:04:04	1
650489	655343	21/07/2014	16:04:08	1
650484	655343	21/07/2014	16:04:10	1
650479	655344	21/07/2014	16:04:12	1
650474	655345	21/07/2014	16:04:14	1
650469	655346	21/07/2014	16:04:16	1
650464	655346	21/07/2014	16:04:18	1
650459	655347	21/07/2014	16:04:20	3
650454	655347	21/07/2014	16:04:22	2
650444	655347	21/07/2014	16:04:26	3
650440	655347	21/07/2014	16:04:28	1
650435	655346	21/07/2014	16:04:30	1
650430	655346	21/07/2014	16:04:32	1
650425	655346	21/07/2014	16:04:34	1
650421	655345	21/07/2014	16:04:36	1
650416	655345	21/07/2014	16:04:39	1
650411	655344	21/07/2014	16:04:41	1
650406	655344	21/07/2014	16:04:43	1
650401	655343	21/07/2014	16:04:45	1
650396	655343	21/07/2014	16:04:47	1
650390	655343	21/07/2014	16:04:49	3
650385	655343	21/07/2014	16:04:51	1
650380	655342	21/07/2014	16:04:53	2
650376	655342	21/07/2014	16:04:55	1
650370	655341	21/07/2014	16:04:57	2
650365	655341	21/07/2014	16:04:59	1
650360	655341	21/07/2014	16:05:01	1
650355	655340	21/07/2014	16:05:03	1
650350	655339	21/07/2014	16:05:05	2
650346	655339	21/07/2014	16:05:07	2
650340	655338	21/07/2014	16:05:09	2
650335	655337	21/07/2014	16:05:11	1
650330	655336	21/07/2014	16:05:13	1
650326	655334	21/07/2014	16:05:15	2
650321	655333	21/07/2014	16:05:17	1
650316	655331	21/07/2014	16:05:19	2
650307	655327	21/07/2014	16:05:23	1
650302	655326	21/07/2014	16:05:25	1
650297	655324	21/07/2014	16:05:27	1
650292	655322	21/07/2014	16:05:30	1
650283	655319	21/07/2014	16:05:34	1
650278	655317	21/07/2014	16:05:36	1
650273	655316	21/07/2014	16:05:38	1
650268	655314	21/07/2014	16:05:40	1
650263	655313	21/07/2014	16:05:42	1
650258	655311	21/07/2014	16:05:44	1
650256	655310	21/07/2014	16:05:45	1
650253	655295	21/07/2014	16:05:59	1
650257	655292	21/07/2014	16:06:01	1
650261	655288	21/07/2014	16:06:03	1
650265	655286	21/07/2014	16:06:05	1
650270	655286	21/07/2014	16:06:07	1
650274	655288	21/07/2014	16:06:09	1
650277	655292	21/07/2014	16:06:11	1
650281	655295	21/07/2014	16:06:13	1
650286	655298	21/07/2014	16:06:15	1
650291	655300	21/07/2014	16:06:17	2
650296	655302	21/07/2014	16:06:19	1
650302	655304	21/07/2014	16:06:21	1
650307	655305	21/07/2014	16:06:23	1
650312	655307	21/07/2014	16:06:25	1
650318	655309	21/07/2014	16:06:28	1
650323	655311	21/07/2014	16:06:30	1
650328	655313	21/07/2014	16:06:32	1
650334	655315	21/07/2014	16:06:34	1
650339	655317	21/07/2014	16:06:36	1
650350	655321	21/07/2014	16:06:40	2
650356	655323	21/07/2014	16:06:42	1
650363	655324	21/07/2014	16:06:44	1
650369	655325	21/07/2014	16:06:46	1
650381	655324	21/07/2014	16:06:50	1
650388	655323	21/07/2014	16:06:52	1
650394	655322	21/07/2014	16:06:54	1
650406	655321	21/07/2014	16:06:58	1
650412	655321	21/07/2014	16:07:00	1
650431	655320	21/07/2014	16:07:06	2
650438	655320	21/07/2014	16:07:08	1
650444	655320	21/07/2014	16:07:10	1
650457	655319	21/07/2014	16:07:14	1
650463	655318	21/07/2014	16:07:16	1
650476	655317	21/07/2014	16:07:21	1
650482	655317	21/07/2014	16:07:23	1
650488	655317	21/07/2014	16:07:25	1
650494	655317	21/07/2014	16:07:27	1
650500	655317	21/07/2014	16:07:29	2
650513	655316	21/07/2014	16:07:33	3
650519	655314	21/07/2014	16:07:35	1
650525	655312	21/07/2014	16:07:37	1
650530	655310	21/07/2014	16:07:39	1
650542	655304	21/07/2014	16:07:43	1
650554	655300	21/07/2014	16:07:47	1
650560	655298	21/07/2014	16:07:49	1
650566	655297	21/07/2014	16:07:51	1
650578	655294	21/07/2014	16:07:55	1
650591	655292	21/07/2014	16:07:59	1
650597	655291	21/07/2014	16:08:01	1
650603	655291	21/07/2014	16:08:03	2
650609	655290	21/07/2014	16:08:05	2
650616	655289	21/07/2014	16:08:08	1
650622	655288	21/07/2014	16:08:10	1
650628	655287	21/07/2014	16:08:12	1
650634	655286	21/07/2014	16:08:14	1
650640	655284	21/07/2014	16:08:16	1
650652	655283	21/07/2014	16:08:20	1
650658	655282	21/07/2014	16:08:22	1
650665	655281	21/07/2014	16:08:24	1
650671	655280	21/07/2014	16:08:26	1
650676	655278	21/07/2014	16:08:28	1
650682	655277	21/07/2014	16:08:30	1
650688	655275	21/07/2014	16:08:32	1
650694	655274	21/07/2014	16:08:34	1
650700	655272	21/07/2014	16:08:36	1
650706	655272	21/07/2014	16:08:38	1
650713	655271	21/07/2014	16:08:40	3
650719	655270	21/07/2014	16:08:42	1
650725	655269	21/07/2014	16:08:44	1
650731	655268	21/07/2014	16:08:46	1
650737	655267	21/07/2014	16:08:48	1
650743	655266	21/07/2014	16:08:50	1
650749	655265	21/07/2014	16:08:52	1
650755	655263	21/07/2014	16:08:54	2
650762	655262	21/07/2014	16:08:56	1
650768	655260	21/07/2014	16:08:59	2
650774	655259	21/07/2014	16:09:01	1
650780	655257	21/07/2014	16:09:03	1
650785	655255	21/07/2014	16:09:05	1
650792	655253	21/07/2014	16:09:07	1
650798	655252	21/07/2014	16:09:09	3
650804	655250	21/07/2014	16:09:11	1
650810	655249	21/07/2014	16:09:13	1
650815	655247	21/07/2014	16:09:15	1
650817	655246	21/07/2014	16:09:16	1
650815	655218	21/07/2014	16:09:26	1
650812	655214	21/07/2014	16:09:28	1
650807	655211	21/07/2014	16:09:30	3
650802	655210	21/07/2014	16:09:32	1
650796	655212	21/07/2014	16:09:34	1
650791	655215	21/07/2014	16:09:36	1
650787	655220	21/07/2014	16:09:38	1
650784	655225	21/07/2014	16:09:40	1
650780	655229	21/07/2014	16:09:42	1
650769	655232	21/07/2014	16:09:46	1
650763	655232	21/07/2014	16:09:48	1
650756	655232	21/07/2014	16:09:50	1
650750	655233	21/07/2014	16:09:53	1
650725	655240	21/07/2014	16:10:01	1
650719	655241	21/07/2014	16:10:03	1
650708	655246	21/07/2014	16:10:07	1
650702	655247	21/07/2014	16:10:09	1
650697	655250	21/07/2014	16:10:11	1
650691	655252	21/07/2014	16:10:13	1
650686	655254	21/07/2014	16:10:15	1
650680	655256	21/07/2014	16:10:17	1
650674	655258	21/07/2014	16:10:19	1
650668	655259	21/07/2014	16:10:21	1
650662	655259	21/07/2014	16:10:23	1
650655	655260	21/07/2014	16:10:25	2
650649	655260	21/07/2014	16:10:27	1
650637	655262	21/07/2014	16:10:31	1
650631	655263	21/07/2014	16:10:33	2
650624	655264	21/07/2014	16:10:35	2
650618	655264	21/07/2014	16:10:37	1
650613	655265	21/07/2014	16:10:39	1
650606	655266	21/07/2014	16:10:42	1
650601	655267	21/07/2014	16:10:44	2
650594	655267	21/07/2014	16:10:46	1
650589	655269	21/07/2014	16:10:48	1
650583	655270	21/07/2014	16:10:50	1
650577	655271	21/07/2014	16:10:52	2
650571	655273	21/07/2014	16:10:54	1
650566	655275	21/07/2014	16:10:56	3
650560	655278	21/07/2014	16:10:58	1
650549	655282	21/07/2014	16:11:02	1
650544	655284	21/07/2014	16:11:04	1
650538	655286	21/07/2014	16:11:06	1
650532	655288	21/07/2014	16:11:08	1
650526	655290	21/07/2014	16:11:10	1
650520	655292	21/07/2014	16:11:12	1
650514	655292	21/07/2014	16:11:14	3
650490	655287	21/07/2014	16:11:22	1
650484	655286	21/07/2014	16:11:24	3
650478	655286	21/07/2014	16:11:26	1
650472	655287	21/07/2014	16:11:28	1
650466	655288	21/07/2014	16:11:30	1
650460	655289	21/07/2014	16:11:33	2
650454	655289	21/07/2014	16:11:35	1
650448	655290	21/07/2014	16:11:37	3
650442	655290	21/07/2014	16:11:39	1
650435	655290	21/07/2014	16:11:41	1
650423	655292	21/07/2014	16:11:45	1
650417	655293	21/07/2014	16:11:47	1
650411	655294	21/07/2014	16:11:49	1
650406	655295	21/07/2014	16:11:51	1
650400	655297	21/07/2014	16:11:53	1
650394	655298	21/07/2014	16:11:55	1
650388	655298	21/07/2014	16:11:57	1
650382	655299	21/07/2014	16:11:59	1
650376	655299	21/07/2014	16:12:01	1
650370	655298	21/07/2014	16:12:03	1
650364	655298	21/07/2014	16:12:05	1
650358	655298	21/07/2014	16:12:07	1
650346	655299	21/07/2014	16:12:11	1
650340	655300	21/07/2014	16:12:13	1
650334	655301	21/07/2014	16:12:15	1
650328	655302	21/07/2014	16:12:17	1
650322	655302	21/07/2014	16:12:19	1
650316	655302	21/07/2014	16:12:21	1
650304	655302	21/07/2014	16:12:26	2
650298	655301	21/07/2014	16:12:28	1
650293	655299	21/07/2014	16:12:30	4
650286	655299	21/07/2014	16:12:32	1
650280	655298	21/07/2014	16:12:34	1
650274	655298	21/07/2014	16:12:36	1
650268	655298	21/07/2014	16:12:38	1
650262	655298	21/07/2014	16:12:40	1
650271	655273	21/07/2014	16:12:56	1
650277	655273	21/07/2014	16:12:58	1
650284	655273	21/07/2014	16:13:00	1
650290	655273	21/07/2014	16:13:02	1
650297	655273	21/07/2014	16:13:04	1
650303	655274	21/07/2014	16:13:06	1
650309	655275	21/07/2014	16:13:08	1
650316	655275	21/07/2014	16:13:10	1
650322	655275	21/07/2014	16:13:12	1
650329	655275	21/07/2014	16:13:14	1
650335	655275	21/07/2014	16:13:16	1
650342	655275	21/07/2014	16:13:18	1
650348	655275	21/07/2014	16:13:20	1
650355	655275	21/07/2014	16:13:22	1
650361	655275	21/07/2014	16:13:24	1
650367	655275	21/07/2014	16:13:26	1
650374	655276	21/07/2014	16:13:28	1
650380	655277	21/07/2014	16:13:30	1
650393	655278	21/07/2014	16:13:34	1
650399	655279	21/07/2014	16:13:36	1
650406	655278	21/07/2014	16:13:39	1
650413	655277	21/07/2014	16:13:41	1
650419	655276	21/07/2014	16:13:43	1
650425	655274	21/07/2014	16:13:45	1
650431	655272	21/07/2014	16:13:47	1
650438	655270	21/07/2014	16:13:49	3
650444	655269	21/07/2014	16:13:51	2
650449	655266	21/07/2014	16:13:53	1
650455	655264	21/07/2014	16:13:55	1
650462	655262	21/07/2014	16:13:57	1
650468	655261	21/07/2014	16:13:59	1
650474	655259	21/07/2014	16:14:01	1
650480	655257	21/07/2014	16:14:03	1
650487	655256	21/07/2014	16:14:05	1
650493	655256	21/07/2014	16:14:07	1
650499	655256	21/07/2014	16:14:09	1
650506	655256	21/07/2014	16:14:11	1
650512	655257	21/07/2014	16:14:13	1
650518	655258	21/07/2014	16:14:15	1
650525	655259	21/07/2014	16:14:17	1
650531	655259	21/07/2014	16:14:19	1
650544	655260	21/07/2014	16:14:23	1
650550	655260	21/07/2014	16:14:25	1
650556	655258	21/07/2014	16:14:27	1
650562	655257	21/07/2014	16:14:30	2
650587	655249	21/07/2014	16:14:38	1
650593	655247	21/07/2014	16:14:40	1
650599	655244	21/07/2014	16:14:42	2
650604	655242	21/07/2014	16:14:44	2
650616	655238	21/07/2014	16:14:48	2
650622	655236	21/07/2014	16:14:50	1
650628	655234	21/07/2014	16:14:52	1
650641	655231	21/07/2014	16:14:56	1
650653	655228	21/07/2014	16:15:00	1
650665	655226	21/07/2014	16:15:04	2
650671	655225	21/07/2014	16:15:06	2
650683	655223	21/07/2014	16:15:10	1
650690	655222	21/07/2014	16:15:12	1
650696	655222	21/07/2014	16:15:14	2
650715	655220	21/07/2014	16:15:21	1
650721	655219	21/07/2014	16:15:23	2
650727	655218	21/07/2014	16:15:25	2
650740	655216	21/07/2014	16:15:29	1
650752	655212	21/07/2014	16:15:33	3
650758	655210	21/07/2014	16:15:35	1
650764	655207	21/07/2014	16:15:37	2
650769	655205	21/07/2014	16:15:39	1
650775	655202	21/07/2014	16:15:41	1
650781	655199	21/07/2014	16:15:43	1
650786	655196	21/07/2014	16:15:45	1
650791	655192	21/07/2014	16:15:47	1
650796	655189	21/07/2014	16:15:49	1
650802	655186	21/07/2014	16:15:51	1
650807	655182	21/07/2014	16:15:53	1
650812	655178	21/07/2014	16:15:55	2
650815	655176	21/07/2014	16:15:57	1
650812	655145	21/07/2014	16:16:15	1
650788	655156	21/07/2014	16:16:23	1
650783	655159	21/07/2014	16:16:25	1
650777	655161	21/07/2014	16:16:27	1
650771	655163	21/07/2014	16:16:29	1
650766	655166	21/07/2014	16:16:31	1
650749	655175	21/07/2014	16:16:37	2
650743	655178	21/07/2014	16:16:39	1
650725	655184	21/07/2014	16:16:45	2
650719	655184	21/07/2014	16:16:47	1
650713	655185	21/07/2014	16:16:49	1
650707	655186	21/07/2014	16:16:51	1
650701	655186	21/07/2014	16:16:53	1
650694	655187	21/07/2014	16:16:55	1
650688	655188	21/07/2014	16:16:57	1
650683	655189	21/07/2014	16:16:59	1
650677	655190	21/07/2014	16:17:01	1
650671	655191	21/07/2014	16:17:04	3
650665	655193	21/07/2014	16:17:06	1
650659	655194	21/07/2014	16:17:08	3
650653	655196	21/07/2014	16:17:10	1
650647	655197	21/07/2014	16:17:12	1
650641	655198	21/07/2014	16:17:14	1
650635	655199	21/07/2014	16:17:16	1
650629	655200	21/07/2014	16:17:18	1
650622	655200	21/07/2014	16:17:20	1
650616	655201	21/07/2014	16:17:22	2
650593	655208	21/07/2014	16:17:30	1
650587	655209	21/07/2014	16:17:32	1
650582	655210	21/07/2014	16:17:34	1
650571	655215	21/07/2014	16:17:38	1
650566	655218	21/07/2014	16:17:40	1
650560	655220	21/07/2014	16:17:42	1
650554	655221	21/07/2014	16:17:44	1
650549	655222	21/07/2014	16:17:46	1
650543	655223	21/07/2014	16:17:48	2
650538	655225	21/07/2014	16:17:50	1
650532	655227	21/07/2014	16:17:52	1
650526	655229	21/07/2014	16:17:55	1
650520	655231	21/07/2014	16:17:57	2
650514	655233	21/07/2014	16:17:59	2
650508	655235	21/07/2014	16:18:01	1
650503	655237	21/07/2014	16:18:03	1
650497	655238	21/07/2014	16:18:05	1
650491	655238	21/07/2014	16:18:07	1
650484	655239	21/07/2014	16:18:09	1
650478	655240	21/07/2014	16:18:11	1
650466	655243	21/07/2014	16:18:15	1
650459	655244	21/07/2014	16:18:17	1
650453	655245	21/07/2014	16:18:19	1
650441	655247	21/07/2014	16:18:23	1
650435	655249	21/07/2014	16:18:25	1
650429	655249	21/07/2014	16:18:27	1
650423	655250	21/07/2014	16:18:29	1
650418	655252	21/07/2014	16:18:31	1
650412	655253	21/07/2014	16:18:33	1
650406	655254	21/07/2014	16:18:35	1
650400	655254	21/07/2014	16:18:37	1
650394	655254	21/07/2014	16:18:39	1
650388	655254	21/07/2014	16:18:41	1
650382	655254	21/07/2014	16:18:44	1
650376	655254	21/07/2014	16:18:46	1
650370	655255	21/07/2014	16:18:48	1
650363	655256	21/07/2014	16:18:50	1
650357	655257	21/07/2014	16:18:52	1
650351	655258	21/07/2014	16:18:54	1
650345	655259	21/07/2014	16:18:56	1
650339	655259	21/07/2014	16:18:58	1
650333	655260	21/07/2014	16:19:00	1
650327	655261	21/07/2014	16:19:02	1
650321	655262	21/07/2014	16:19:04	1
650315	655263	21/07/2014	16:19:06	1
650309	655264	21/07/2014	16:19:08	1
650303	655265	21/07/2014	16:19:10	1
650297	655265	21/07/2014	16:19:12	1
650291	655266	21/07/2014	16:19:14	1
650287	655265	21/07/2014	16:19:16	1
650285	655264	21/07/2014	16:19:17	1
650305	655238	21/07/2014	16:19:32	1
650311	655236	21/07/2014	16:19:34	1
650316	655232	21/07/2014	16:19:36	1
650322	655229	21/07/2014	16:19:38	1
650328	655228	21/07/2014	16:19:40	1
650334	655228	21/07/2014	16:19:42	1
650340	655229	21/07/2014	16:19:44	1
650346	655230	21/07/2014	16:19:46	1
650352	655230	21/07/2014	16:19:48	1
650359	655230	21/07/2014	16:19:50	1
650366	655231	21/07/2014	16:19:52	1
650372	655231	21/07/2014	16:19:54	2
650379	655231	21/07/2014	16:19:56	1
650385	655230	21/07/2014	16:19:58	1
650392	655229	21/07/2014	16:20:00	1
650398	655229	21/07/2014	16:20:02	1
650405	655228	21/07/2014	16:20:04	3
650411	655227	21/07/2014	16:20:06	1
650416	655225	21/07/2014	16:20:08	1
650422	655222	21/07/2014	16:20:10	1
650428	655219	21/07/2014	16:20:12	1
650433	655217	21/07/2014	16:20:14	1
650439	655215	21/07/2014	16:20:16	1
650445	655213	21/07/2014	16:20:19	1
650451	655212	21/07/2014	16:20:21	1
650457	655212	21/07/2014	16:20:23	1
650464	655211	21/07/2014	16:20:25	1
650470	655211	21/07/2014	16:20:27	1
650477	655210	21/07/2014	16:20:29	1
650484	655209	21/07/2014	16:20:31	1
650496	655207	21/07/2014	16:20:35	1
650503	655206	21/07/2014	16:20:37	1
650509	655204	21/07/2014	16:20:39	1
650515	655202	21/07/2014	16:20:41	1
650521	655201	21/07/2014	16:20:43	1
650528	655199	21/07/2014	16:20:45	1
650534	655197	21/07/2014	16:20:47	1
650539	655195	21/07/2014	16:20:49	1
650546	655193	21/07/2014	16:20:51	1
650551	655192	21/07/2014	16:20:53	2
650558	655190	21/07/2014	16:20:55	1
650564	655188	21/07/2014	16:20:57	2
650570	655186	21/07/2014	16:20:59	1
650576	655184	21/07/2014	16:21:01	1
650596	655180	21/07/2014	16:21:08	2
650602	655179	21/07/2014	16:21:10	1
650608	655178	21/07/2014	16:21:12	1
650615	655176	21/07/2014	16:21:14	1
650622	655175	21/07/2014	16:21:16	1
650628	655173	21/07/2014	16:21:18	1
650634	655172	21/07/2014	16:21:20	1
650640	655171	21/07/2014	16:21:22	1
650646	655170	21/07/2014	16:21:24	1
650653	655169	21/07/2014	16:21:26	2
650659	655167	21/07/2014	16:21:28	1
650665	655166	21/07/2014	16:21:30	1
650672	655165	21/07/2014	16:21:32	1
650678	655164	21/07/2014	16:21:34	3
650685	655162	21/07/2014	16:21:36	1
650691	655161	21/07/2014	16:21:38	3
650704	655158	21/07/2014	16:21:42	1
650710	655157	21/07/2014	16:21:44	1
650716	655156	21/07/2014	16:21:46	2
650722	655154	21/07/2014	16:21:48	2
650728	655153	21/07/2014	16:21:50	1
650735	655152	21/07/2014	16:21:52	1
650748	655150	21/07/2014	16:21:56	1
650754	655150	21/07/2014	16:21:59	1
650760	655149	21/07/2014	16:22:01	3
650773	655148	21/07/2014	16:22:05	1
650779	655147	21/07/2014	16:22:07	1
650785	655146	21/07/2014	16:22:09	1
650792	655146	21/07/2014	16:22:11	1
650798	655146	21/07/2014	16:22:13	1
650804	655146	21/07/2014	16:22:15	1
650783	655120	21/07/2014	16:22:34	1
650778	655121	21/07/2014	16:22:36	3
650771	655122	21/07/2014	16:22:38	1
650765	655123	21/07/2014	16:22:40	2
650759	655124	21/07/2014	16:22:42	1
650753	655125	21/07/2014	16:22:44	2
650747	655126	21/07/2014	16:22:46	1
650741	655128	21/07/2014	16:22:48	2
650735	655129	21/07/2014	16:22:50	1
650730	655130	21/07/2014	16:22:52	1
650718	655133	21/07/2014	16:22:57	1
650712	655134	21/07/2014	16:22:59	1
650700	655135	21/07/2014	16:23:03	1
650688	655137	21/07/2014	16:23:07	1
650683	655137	21/07/2014	16:23:09	1
650677	655139	21/07/2014	16:23:11	1
650671	655140	21/07/2014	16:23:13	1
650665	655141	21/07/2014	16:23:15	2
650659	655142	21/07/2014	16:23:17	1
650654	655143	21/07/2014	16:23:19	2
650648	655143	21/07/2014	16:23:21	2
650642	655143	21/07/2014	16:23:23	1
650637	655143	21/07/2014	16:23:25	1
650631	655144	21/07/2014	16:23:27	1
650626	655146	21/07/2014	16:23:29	2
650620	655147	21/07/2014	16:23:31	1
650614	655149	21/07/2014	16:23:33	2
650603	655152	21/07/2014	16:23:37	1
650598	655154	21/07/2014	16:23:39	1
650592	655155	21/07/2014	16:23:41	1
650587	655157	21/07/2014	16:23:43	1
650581	655158	21/07/2014	16:23:46	1
650575	655159	21/07/2014	16:23:48	1
650570	655160	21/07/2014	16:23:50	1
650564	655162	21/07/2014	16:23:52	1
650558	655163	21/07/2014	16:23:54	1
650552	655165	21/07/2014	16:23:56	1
650547	655167	21/07/2014	16:23:58	1
650542	655169	21/07/2014	16:24:00	1
650536	655172	21/07/2014	16:24:02	1
650531	655174	21/07/2014	16:24:04	1
650525	655175	21/07/2014	16:24:06	1
650520	655176	21/07/2014	16:24:08	1
650514	655176	21/07/2014	16:24:10	1
650508	655177	21/07/2014	16:24:12	1
650502	655177	21/07/2014	16:24:14	1
650496	655178	21/07/2014	16:24:16	1
650490	655179	21/07/2014	16:24:18	1
650485	655180	21/07/2014	16:24:20	1
650479	655182	21/07/2014	16:24:22	1
650474	655184	21/07/2014	16:24:24	1
650468	655185	21/07/2014	16:24:26	1
650462	655187	21/07/2014	16:24:28	1
650456	655188	21/07/2014	16:24:30	1
650450	655190	21/07/2014	16:24:32	1
650444	655192	21/07/2014	16:24:34	1
650438	655193	21/07/2014	16:24:37	3
650433	655194	21/07/2014	16:24:39	1
650427	655196	21/07/2014	16:24:41	1
650422	655198	21/07/2014	16:24:43	1
650416	655199	21/07/2014	16:24:45	1
650411	655201	21/07/2014	16:24:47	1
650405	655203	21/07/2014	16:24:49	3
650399	655204	21/07/2014	16:24:51	1
650394	655206	21/07/2014	16:24:53	3
650388	655208	21/07/2014	16:24:55	1
650383	655210	21/07/2014	16:24:57	1
650377	655211	21/07/2014	16:24:59	1
650371	655213	21/07/2014	16:25:01	1
650366	655215	21/07/2014	16:25:03	1
650360	655216	21/07/2014	16:25:05	2
650354	655218	21/07/2014	16:25:07	1
650348	655219	21/07/2014	16:25:09	3
650342	655221	21/07/2014	16:25:11	1
650337	655223	21/07/2014	16:25:13	2
650331	655225	21/07/2014	16:25:15	1
650326	655227	21/07/2014	16:25:17	1
650320	655229	21/07/2014	16:25:19	1
650315	655230	21/07/2014	16:25:21	1
650309	655231	21/07/2014	16:25:23	1
650305	655231	21/07/2014	16:25:26	3
650304	655231	21/07/2014	16:25:27	1
650312	655206	21/07/2014	16:25:40	1
650317	655205	21/07/2014	16:25:42	1
650322	655205	21/07/2014	16:25:44	3
650328	655203	21/07/2014	16:25:46	2
650333	655201	21/07/2014	16:25:48	1
650338	655197	21/07/2014	16:25:50	1
650342	655194	21/07/2014	16:25:52	1
650346	655190	21/07/2014	16:25:54	1
650351	655187	21/07/2014	16:25:56	1
650356	655183	21/07/2014	16:25:58	1
650361	655181	21/07/2014	16:26:00	1
650366	655178	21/07/2014	16:26:02	1
650372	655176	21/07/2014	16:26:04	1
650378	655173	21/07/2014	16:26:07	1
650383	655170	21/07/2014	16:26:09	1
650389	655168	21/07/2014	16:26:11	1
650395	655165	21/07/2014	16:26:13	1
650401	655163	21/07/2014	16:26:15	1
650407	655162	21/07/2014	16:26:17	1
650414	655160	21/07/2014	16:26:19	1
650420	655159	21/07/2014	16:26:21	1
650427	655159	21/07/2014	16:26:23	1
650433	655158	21/07/2014	16:26:25	3
650440	655156	21/07/2014	16:26:27	1
650446	655156	21/07/2014	16:26:29	1
650452	655155	21/07/2014	16:26:31	1
650459	655154	21/07/2014	16:26:33	1
650465	655153	21/07/2014	16:26:35	1
650472	655152	21/07/2014	16:26:37	1
650478	655151	21/07/2014	16:26:39	1
650485	655151	21/07/2014	16:26:41	1
650491	655150	21/07/2014	16:26:43	1
650498	655149	21/07/2014	16:26:45	1
650504	655147	21/07/2014	16:26:47	1
650510	655146	21/07/2014	16:26:49	1
650517	655144	21/07/2014	16:26:51	1
650523	655143	21/07/2014	16:26:53	1
650529	655141	21/07/2014	16:26:56	1
650535	655140	21/07/2014	16:26:58	1
650541	655138	21/07/2014	16:27:00	3
650547	655135	21/07/2014	16:27:02	1
650553	655133	21/07/2014	16:27:04	1
650559	655130	21/07/2014	16:27:06	1
650565	655128	21/07/2014	16:27:08	1
650571	655127	21/07/2014	16:27:10	1
650578	655125	21/07/2014	16:27:12	3
650584	655123	21/07/2014	16:27:14	2
650610	655118	21/07/2014	16:27:22	1
650616	655116	21/07/2014	16:27:24	1
650629	655113	21/07/2014	16:27:28	1
650635	655111	21/07/2014	16:27:30	1
650641	655109	21/07/2014	16:27:32	1
650647	655107	21/07/2014	16:27:34	1
650654	655105	21/07/2014	16:27:36	1
650660	655103	21/07/2014	16:27:38	1
650666	655101	21/07/2014	16:27:40	1
650679	655099	21/07/2014	16:27:44	2
650686	655098	21/07/2014	16:27:47	1
650692	655097	21/07/2014	16:27:49	2
650699	655097	21/07/2014	16:27:51	1
650706	655097	21/07/2014	16:27:53	1
650712	655097	21/07/2014	16:27:55	1
650725	655096	21/07/2014	16:27:59	1
650732	655095	21/07/2014	16:28:01	1
650738	655094	21/07/2014	16:28:03	3
650745	655092	21/07/2014	16:28:05	1
650751	655090	21/07/2014	16:28:07	1
650757	655089	21/07/2014	16:28:09	1
650763	655087	21/07/2014	16:28:11	1
650770	655085	21/07/2014	16:28:13	1
650776	655083	21/07/2014	16:28:15	1
650782	655081	21/07/2014	16:28:17	1
650788	655078	21/07/2014	16:28:19	1
650793	655075	21/07/2014	16:28:21	1
650781	655048	21/07/2014	16:28:34	4
650776	655051	21/07/2014	16:28:36	1
650772	655055	21/07/2014	16:28:38	3
650768	655059	21/07/2014	16:28:40	1
650762	655061	21/07/2014	16:28:42	1
650756	655062	21/07/2014	16:28:44	1
650750	655063	21/07/2014	16:28:46	1
650744	655064	21/07/2014	16:28:48	1
650737	655066	21/07/2014	16:28:50	1
650731	655067	21/07/2014	16:28:52	1
650725	655069	21/07/2014	16:28:54	1
650719	655071	21/07/2014	16:28:57	1
650713	655072	21/07/2014	16:28:59	1
650707	655072	21/07/2014	16:29:01	3
650701	655072	21/07/2014	16:29:03	1
650695	655072	21/07/2014	16:29:05	3
650671	655077	21/07/2014	16:29:13	1
650665	655078	21/07/2014	16:29:15	1
650652	655080	21/07/2014	16:29:19	2
650647	655082	21/07/2014	16:29:21	1
650641	655084	21/07/2014	16:29:23	2
650635	655086	21/07/2014	16:29:25	1
650629	655088	21/07/2014	16:29:27	3
650623	655090	21/07/2014	16:29:29	1
650617	655092	21/07/2014	16:29:31	1
650611	655094	21/07/2014	16:29:33	1
650605	655096	21/07/2014	16:29:35	1
650600	655098	21/07/2014	16:29:37	1
650594	655099	21/07/2014	16:29:39	3
650587	655101	21/07/2014	16:29:41	2
650581	655102	21/07/2014	16:29:43	1
650575	655103	21/07/2014	16:29:46	1
650569	655105	21/07/2014	16:29:48	1
650563	655106	21/07/2014	16:29:50	1
650557	655108	21/07/2014	16:29:52	1
650551	655109	21/07/2014	16:29:54	1
650545	655109	21/07/2014	16:29:56	1
650539	655110	21/07/2014	16:29:58	1
650533	655111	21/07/2014	16:30:00	1
650527	655113	21/07/2014	16:30:02	1
650521	655115	21/07/2014	16:30:04	1
650515	655116	21/07/2014	16:30:06	1
650509	655118	21/07/2014	16:30:08	1
650503	655120	21/07/2014	16:30:10	1
650497	655121	21/07/2014	16:30:12	1
650491	655123	21/07/2014	16:30:14	3
650485	655125	21/07/2014	16:30:16	1
650479	655127	21/07/2014	16:30:18	1
650473	655128	21/07/2014	16:30:20	1
650467	655130	21/07/2014	16:30:22	1
650461	655132	21/07/2014	16:30:24	3
650455	655133	21/07/2014	16:30:26	1
650449	655135	21/07/2014	16:30:28	1
650443	655136	21/07/2014	16:30:30	1
650437	655138	21/07/2014	16:30:32	1
650431	655139	21/07/2014	16:30:34	1
650425	655141	21/07/2014	16:30:37	1
650419	655143	21/07/2014	16:30:39	1
650413	655144	21/07/2014	16:30:41	1
650407	655146	21/07/2014	16:30:43	1
650401	655148	21/07/2014	16:30:45	1
650395	655150	21/07/2014	16:30:47	1
650389	655152	21/07/2014	16:30:49	1
650383	655153	21/07/2014	16:30:51	1
650377	655155	21/07/2014	16:30:53	1
650371	655157	21/07/2014	16:30:55	1
650365	655159	21/07/2014	16:30:57	1
650359	655161	21/07/2014	16:30:59	1
650353	655163	21/07/2014	16:31:01	1
650347	655164	21/07/2014	16:31:03	1
650341	655165	21/07/2014	16:31:05	1
650335	655166	21/07/2014	16:31:07	1
650329	655166	21/07/2014	16:31:09	1
650322	655167	21/07/2014	16:31:11	1
650316	655168	21/07/2014	16:31:13	1
650310	655168	21/07/2014	16:31:15	1
650303	655169	21/07/2014	16:31:17	1
650297	655170	21/07/2014	16:31:19	1
650292	655171	21/07/2014	16:31:21	1
650287	655172	21/07/2014	16:31:23	1
650285	655173	21/07/2014	16:31:25	1
649522	656697	22/07/2014	13:14:14	4
649524	656699	22/07/2014	13:14:16	4
649527	656699	22/07/2014	13:14:18	4
649529	656700	22/07/2014	13:14:20	5
649532	656700	22/07/2014	13:14:22	4
649534	656701	22/07/2014	13:14:24	4
649537	656701	22/07/2014	13:14:26	3
649539	656702	22/07/2014	13:14:28	4
649541	656702	22/07/2014	13:14:30	4
649544	656703	22/07/2014	13:14:32	3
649546	656703	22/07/2014	13:14:34	3
649549	656704	22/07/2014	13:14:36	4
649551	656704	22/07/2014	13:14:38	4
649553	656705	22/07/2014	13:14:40	4
649554	656705	22/07/2014	13:14:41	3
649586	656709	22/07/2014	13:15:04	3
649591	656709	22/07/2014	13:15:06	3
649595	656710	22/07/2014	13:15:08	2
649600	656710	22/07/2014	13:15:10	4
649605	656712	22/07/2014	13:15:12	5
649611	656713	22/07/2014	13:15:14	4
649615	656714	22/07/2014	13:15:16	4
649620	656715	22/07/2014	13:15:18	4
649626	656716	22/07/2014	13:15:20	4
649631	656717	22/07/2014	13:15:22	4
649636	656719	22/07/2014	13:15:24	4
649641	656720	22/07/2014	13:15:27	3
649646	656721	22/07/2014	13:15:29	4
649652	656723	22/07/2014	13:15:31	3
649657	656723	22/07/2014	13:15:33	4
649663	656724	22/07/2014	13:15:35	4
649668	656725	22/07/2014	13:15:37	4
649673	656726	22/07/2014	13:15:39	4
649678	656727	22/07/2014	13:15:41	4
649684	656728	22/07/2014	13:15:43	2
649690	656728	22/07/2014	13:15:45	5
649696	656729	22/07/2014	13:15:47	4
649703	656730	22/07/2014	13:15:49	2
649709	656731	22/07/2014	13:15:51	2
649715	656731	22/07/2014	13:15:53	4
649720	656732	22/07/2014	13:15:55	3
649725	656732	22/07/2014	13:15:57	4
649729	656732	22/07/2014	13:15:59	3
649733	656732	22/07/2014	13:16:01	3
649738	656732	22/07/2014	13:16:03	4
649743	656733	22/07/2014	13:16:05	3
649748	656734	22/07/2014	13:16:07	4
649753	656734	22/07/2014	13:16:09	4
649758	656735	22/07/2014	13:16:11	4
649763	656736	22/07/2014	13:16:13	3
649768	656737	22/07/2014	13:16:15	4
649772	656738	22/07/2014	13:16:17	3
649777	656739	22/07/2014	13:16:19	3
649782	656740	22/07/2014	13:16:22	4
649786	656741	22/07/2014	13:16:24	4
649791	656742	22/07/2014	13:16:26	4
649797	656742	22/07/2014	13:16:28	4
649802	656743	22/07/2014	13:16:30	3
649806	656743	22/07/2014	13:16:32	4
649812	656744	22/07/2014	13:16:34	4
649816	656745	22/07/2014	13:16:36	3
649821	656746	22/07/2014	13:16:38	4
649826	656747	22/07/2014	13:16:40	3
649831	656747	22/07/2014	13:16:42	4
649836	656748	22/07/2014	13:16:44	4
649840	656749	22/07/2014	13:16:46	5
649845	656750	22/07/2014	13:16:48	4
649850	656750	22/07/2014	13:16:50	4
649856	656750	22/07/2014	13:16:52	4
649861	656751	22/07/2014	13:16:54	5
649866	656751	22/07/2014	13:16:56	4
649871	656752	22/07/2014	13:16:58	4
649875	656752	22/07/2014	13:17:00	4
649880	656753	22/07/2014	13:17:02	3
649886	656754	22/07/2014	13:17:04	5
649891	656755	22/07/2014	13:17:06	4
649896	656756	22/07/2014	13:17:08	3
649901	656756	22/07/2014	13:17:10	4
649906	656757	22/07/2014	13:17:12	4
649912	656758	22/07/2014	13:17:15	4
649917	656759	22/07/2014	13:17:17	5
649922	656759	22/07/2014	13:17:19	4
649927	656760	22/07/2014	13:17:21	3
649932	656761	22/07/2014	13:17:23	4
649937	656762	22/07/2014	13:17:25	4
649942	656763	22/07/2014	13:17:27	4
649948	656763	22/07/2014	13:17:29	3
649953	656764	22/07/2014	13:17:31	4
649958	656765	22/07/2014	13:17:33	4
649963	656765	22/07/2014	13:17:35	4
649968	656766	22/07/2014	13:17:37	4
649973	656767	22/07/2014	13:17:39	3
649978	656767	22/07/2014	13:17:41	3
649983	656768	22/07/2014	13:17:43	2
649989	656769	22/07/2014	13:17:45	5
649995	656770	22/07/2014	13:17:47	5
650000	656771	22/07/2014	13:17:49	4
650005	656773	22/07/2014	13:17:51	2
650010	656774	22/07/2014	13:17:53	3
650015	656775	22/07/2014	13:17:55	2
650020	656777	22/07/2014	13:17:57	4
650025	656778	22/07/2014	13:17:59	4
650030	656779	22/07/2014	13:18:01	2
650036	656780	22/07/2014	13:18:03	3
650040	656781	22/07/2014	13:18:05	4
650045	656782	22/07/2014	13:18:08	3
650050	656783	22/07/2014	13:18:10	4
650056	656783	22/07/2014	13:18:12	4
650061	656784	22/07/2014	13:18:14	4
650067	656785	22/07/2014	13:18:16	2
650071	656786	22/07/2014	13:18:18	5
650077	656787	22/07/2014	13:18:20	4
650082	656788	22/07/2014	13:18:22	4
650087	656788	22/07/2014	13:18:24	3
650093	656789	22/07/2014	13:18:26	3
650098	656789	22/07/2014	13:18:28	3
650103	656790	22/07/2014	13:18:30	4
650108	656791	22/07/2014	13:18:32	4
650113	656791	22/07/2014	13:18:34	4
650118	656792	22/07/2014	13:18:36	3
650124	656793	22/07/2014	13:18:38	4
650129	656794	22/07/2014	13:18:40	4
650134	656795	22/07/2014	13:18:42	4
650139	656796	22/07/2014	13:18:44	4
650144	656797	22/07/2014	13:18:46	4
650150	656798	22/07/2014	13:18:48	2
650155	656798	22/07/2014	13:18:50	3
650161	656799	22/07/2014	13:18:52	3
650166	656800	22/07/2014	13:18:54	4
650171	656801	22/07/2014	13:18:56	4
650176	656801	22/07/2014	13:18:58	4
650181	656802	22/07/2014	13:19:00	4
650187	656803	22/07/2014	13:19:03	3
650193	656803	22/07/2014	13:19:05	4
650198	656803	22/07/2014	13:19:07	4
650203	656804	22/07/2014	13:19:09	4
650209	656804	22/07/2014	13:19:11	4
650214	656805	22/07/2014	13:19:13	4
650219	656805	22/07/2014	13:19:15	3
650224	656806	22/07/2014	13:19:17	3
650230	656807	22/07/2014	13:19:19	4
650235	656808	22/07/2014	13:19:21	2
650240	656808	22/07/2014	13:19:23	4
650245	656809	22/07/2014	13:19:25	4
650251	656809	22/07/2014	13:19:27	4
650256	656810	22/07/2014	13:19:29	4
650261	656811	22/07/2014	13:19:31	4
650266	656811	22/07/2014	13:19:33	4
650271	656812	22/07/2014	13:19:35	4
650276	656813	22/07/2014	13:19:37	4
650281	656813	22/07/2014	13:19:39	4
650287	656813	22/07/2014	13:19:41	2
650292	656814	22/07/2014	13:19:43	2
650297	656815	22/07/2014	13:19:45	4
650302	656816	22/07/2014	13:19:47	2
650308	656816	22/07/2014	13:19:49	4
650313	656817	22/07/2014	13:19:51	4
650318	656818	22/07/2014	13:19:53	4
650323	656819	22/07/2014	13:19:56	4
650328	656820	22/07/2014	13:19:58	3
650333	656820	22/07/2014	13:20:00	5
650338	656820	22/07/2014	13:20:02	4
650344	656821	22/07/2014	13:20:04	3
650349	656821	22/07/2014	13:20:06	4
650354	656821	22/07/2014	13:20:08	4
650359	656822	22/07/2014	13:20:10	4
650365	656823	22/07/2014	13:20:12	3
650370	656823	22/07/2014	13:20:14	4
650375	656824	22/07/2014	13:20:16	4
650381	656824	22/07/2014	13:20:18	4
650386	656824	22/07/2014	13:20:20	4
650392	656824	22/07/2014	13:20:22	4
650397	656825	22/07/2014	13:20:24	4
650402	656825	22/07/2014	13:20:26	2
650407	656826	22/07/2014	13:20:28	2
650413	656827	22/07/2014	13:20:30	3
650418	656827	22/07/2014	13:20:32	3
650423	656828	22/07/2014	13:20:34	4
650429	656829	22/07/2014	13:20:36	4
650434	656829	22/07/2014	13:20:38	3
[truncated: 2,895 more rows]
